# Supplementary material for: Dietary Impacts on Changes in Diversity and Abundance of the Murine Microbiome during Progression and Treatment of Cancer
Source: MDPI journal article supplement (doi:10.3390/nu15030724), 2023-01-31
Supplement: s1 [file s1]

# Supplementary Materials

(a)

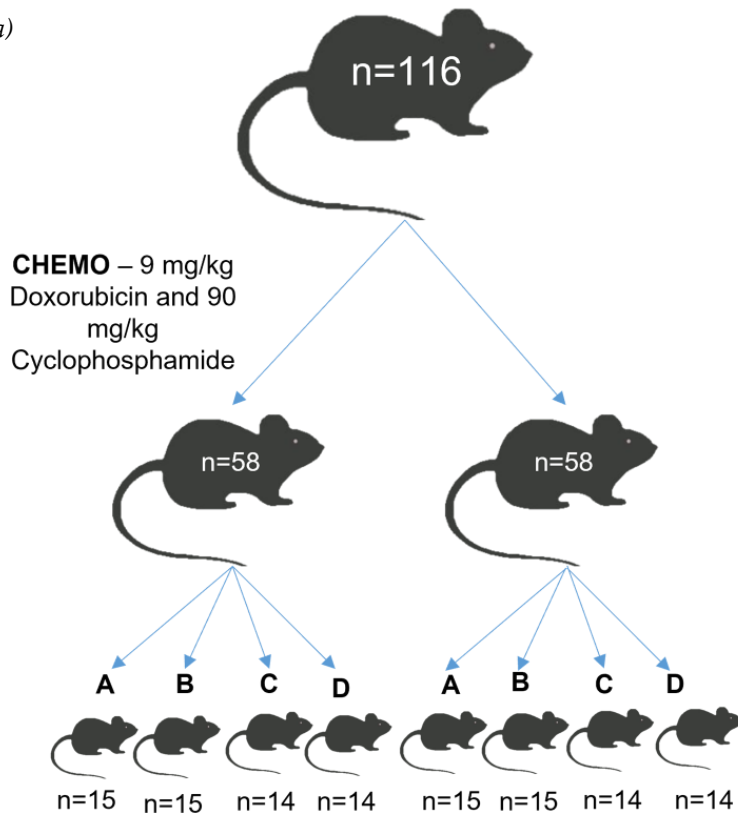

(b)

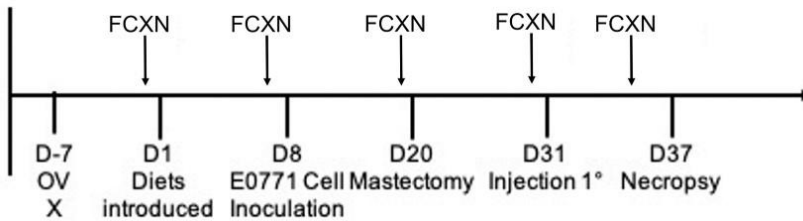

(c)

## DIETS:

- A** low sucrose, high omega3 (2%kcal; EPA/DHA 1.5:1) – D15082608
- B** low sucrose, low omega3 (Low ALA-0% EPA/DHA) – D17011201
- C** high sucrose, high omega3 (2% kcal; EPA/DHA 1.5:1) – D15082609
- D** high sucrose, low omega3 (Low ALA-0% EPA/DHA) – D17091801

**Figure S1.** Experimental design for (a) assigning mice to cohorts, (b) experiment timeline and fecal collection points, and (c) dietary macronutrient balance

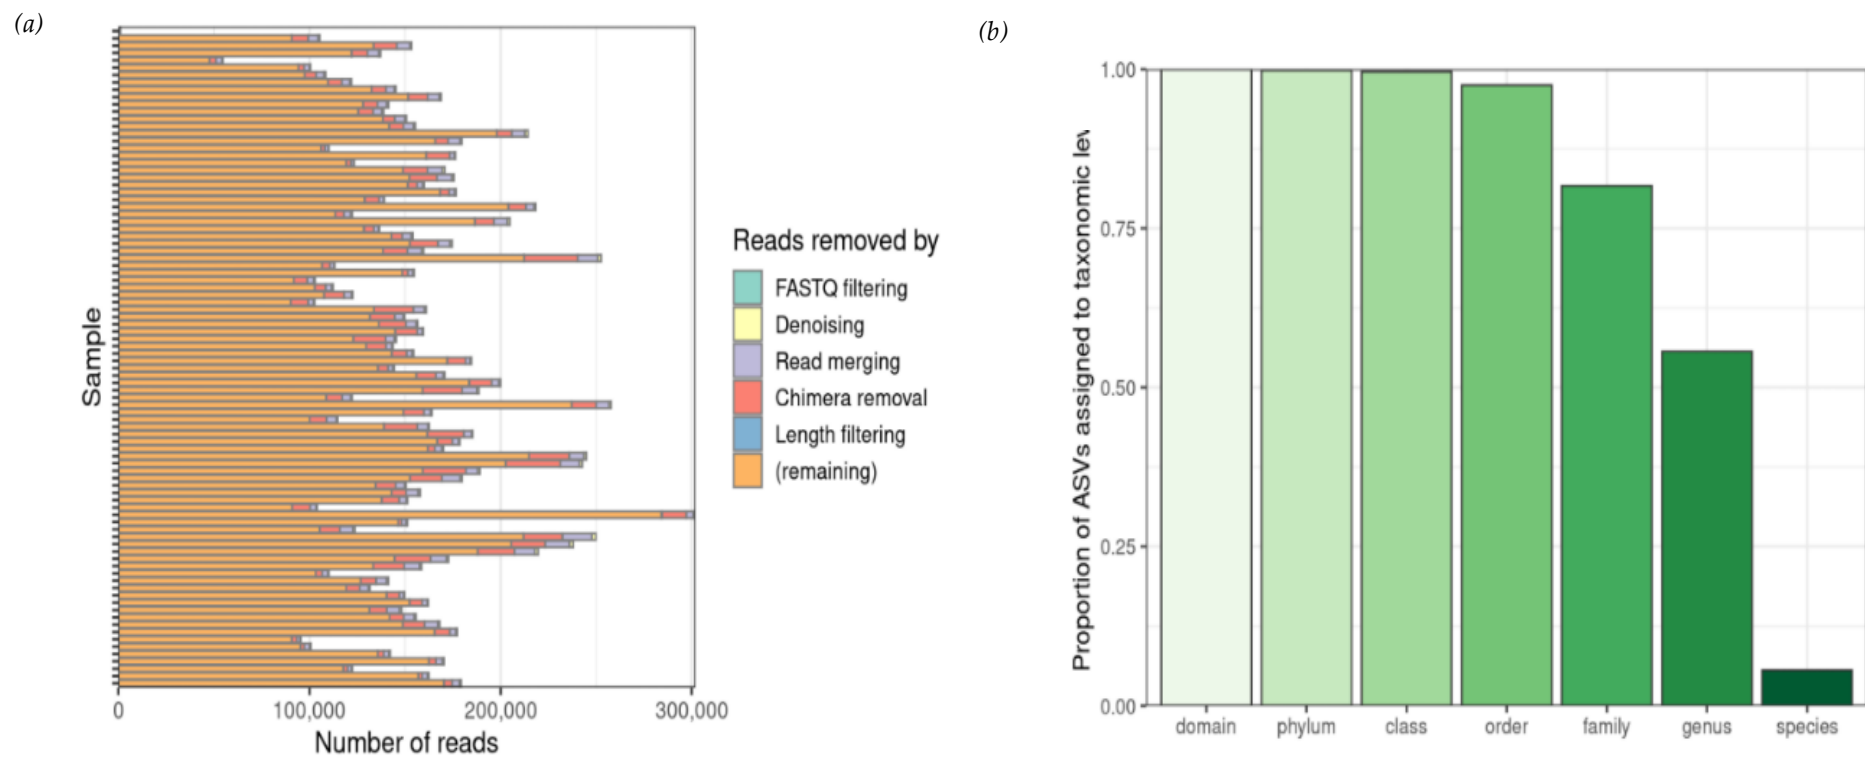

**Figure S2.** Quality control and sample processing (a) filtering and read removal along the data processing pipeline (b) proportion of ASVs assignments by taxonomic level

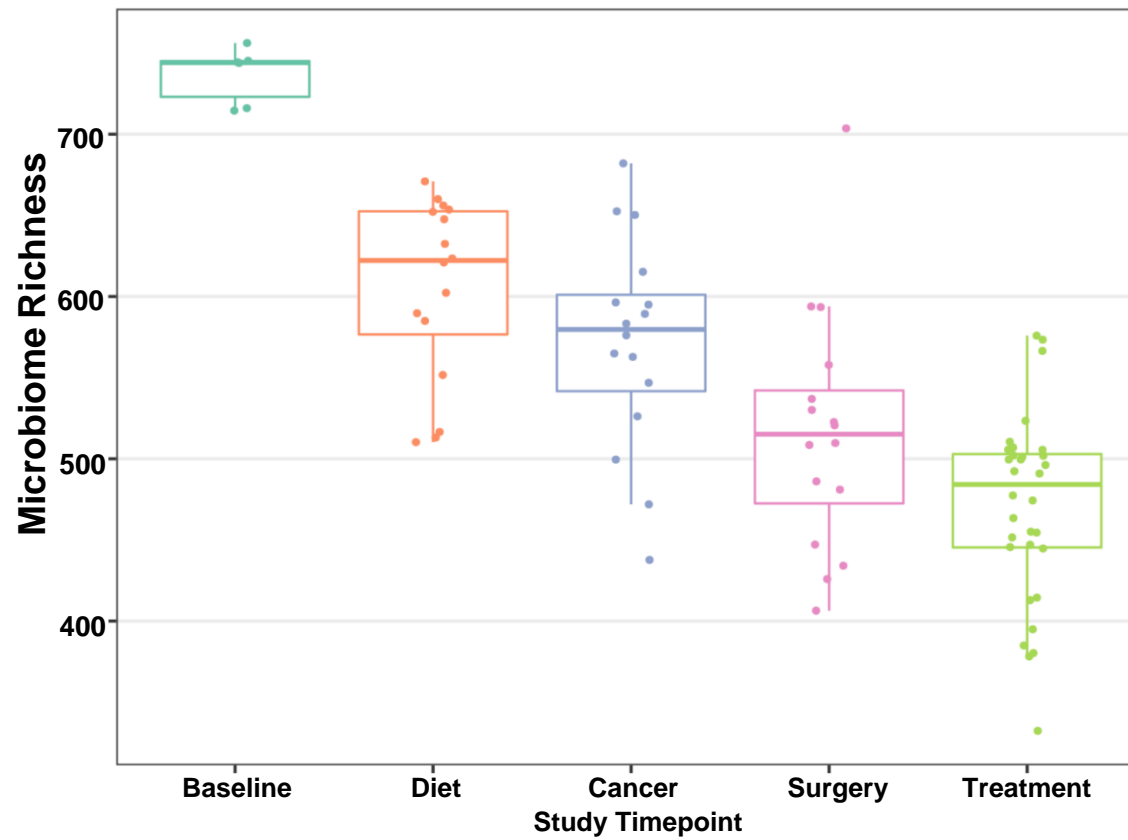

**Figure S3a.** Estimated richness over progression of disease and treatment. Microbiome population richness significantly decreased over time

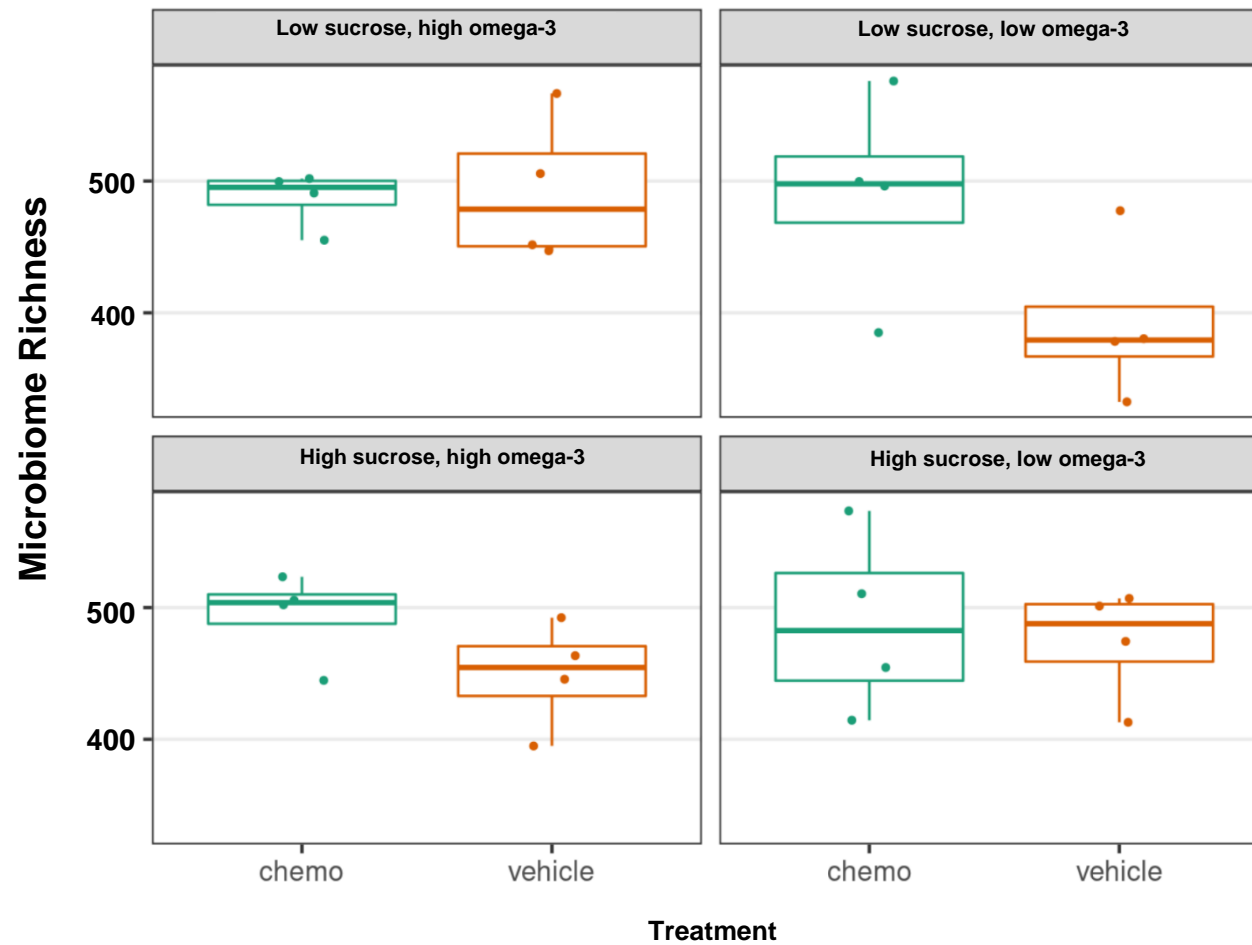

**Figure S3b.** Estimated richness by diet and treatment. Microbiome population richness differed by diet and treatment interactions

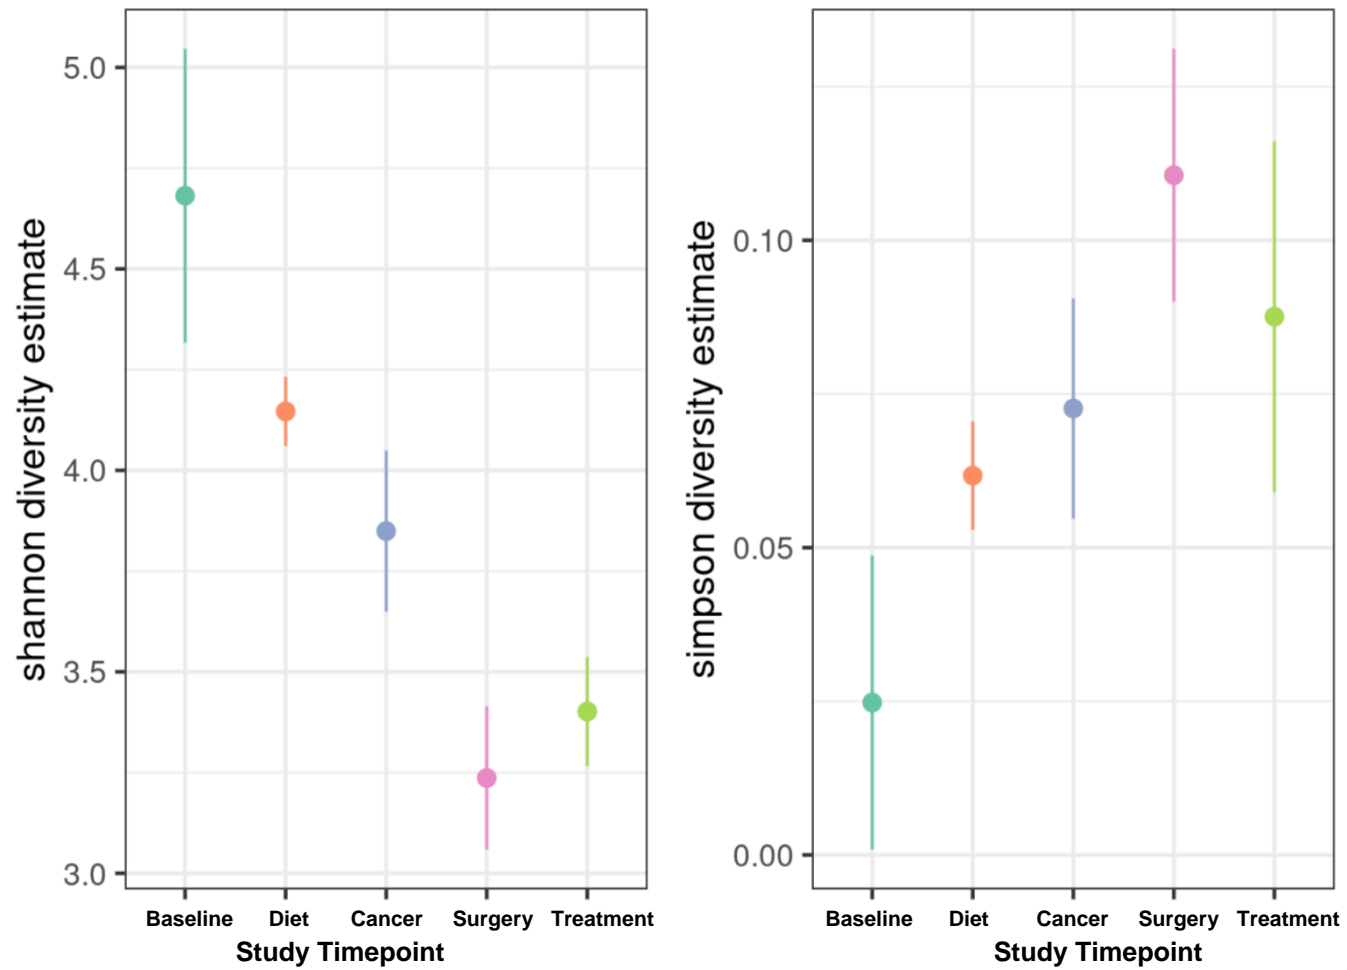

**Figure S4a.** Richness and evenness of ASV/per-sample, weighted by the Shannon and Simpson diversity indices, demonstrate differences in alpha-diversity modeled by study timepoint

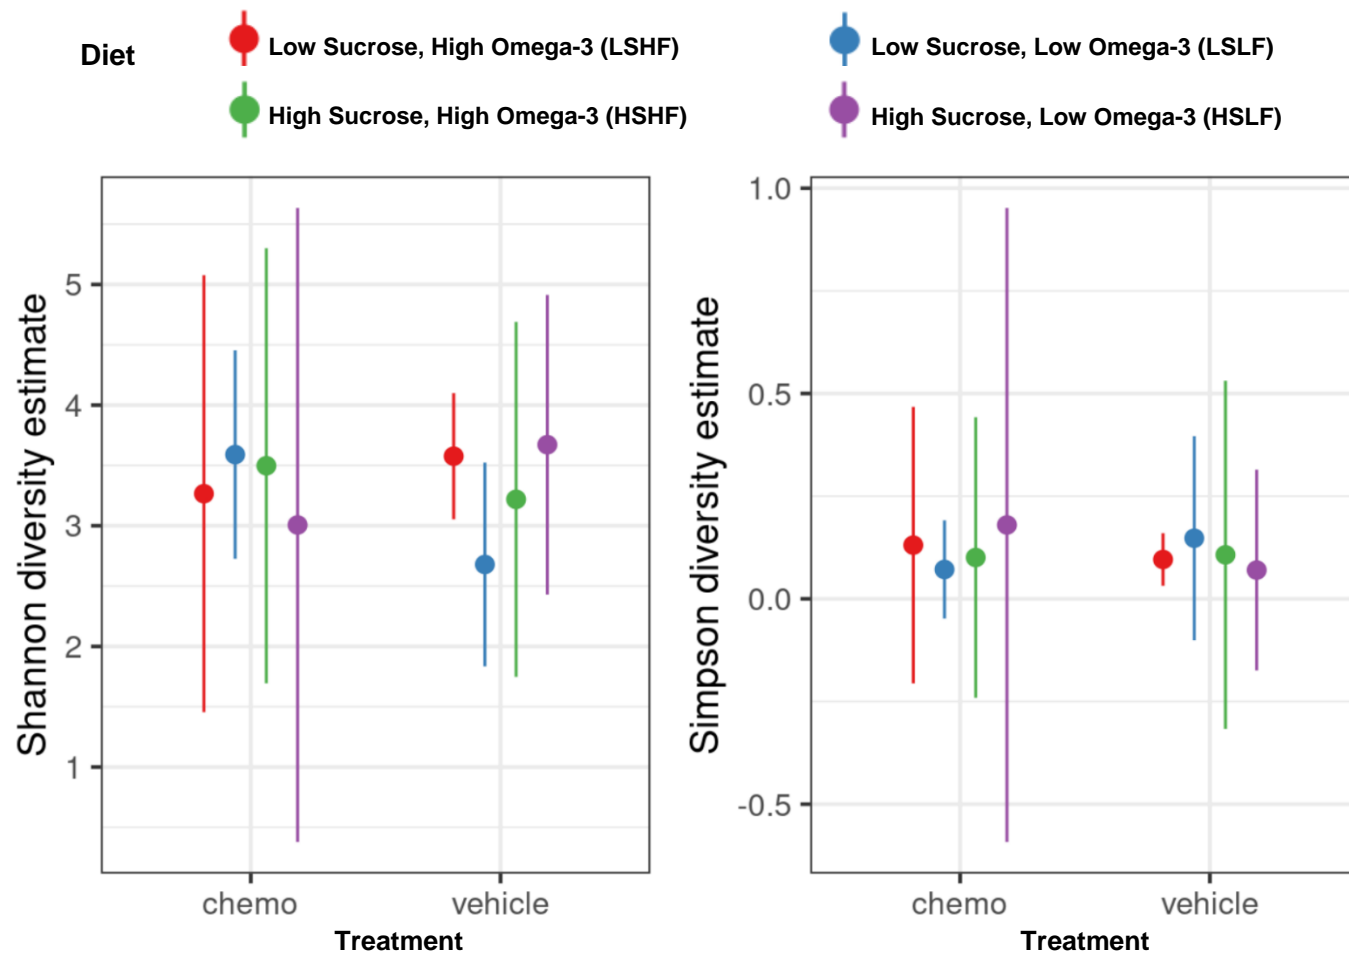

**Figure S4b.** Richness and evenness of ASV/per-sample, weighted by the Shannon and Simpson diversity indices, demonstrate differences in alpha-diversity modeled by diet and treatment

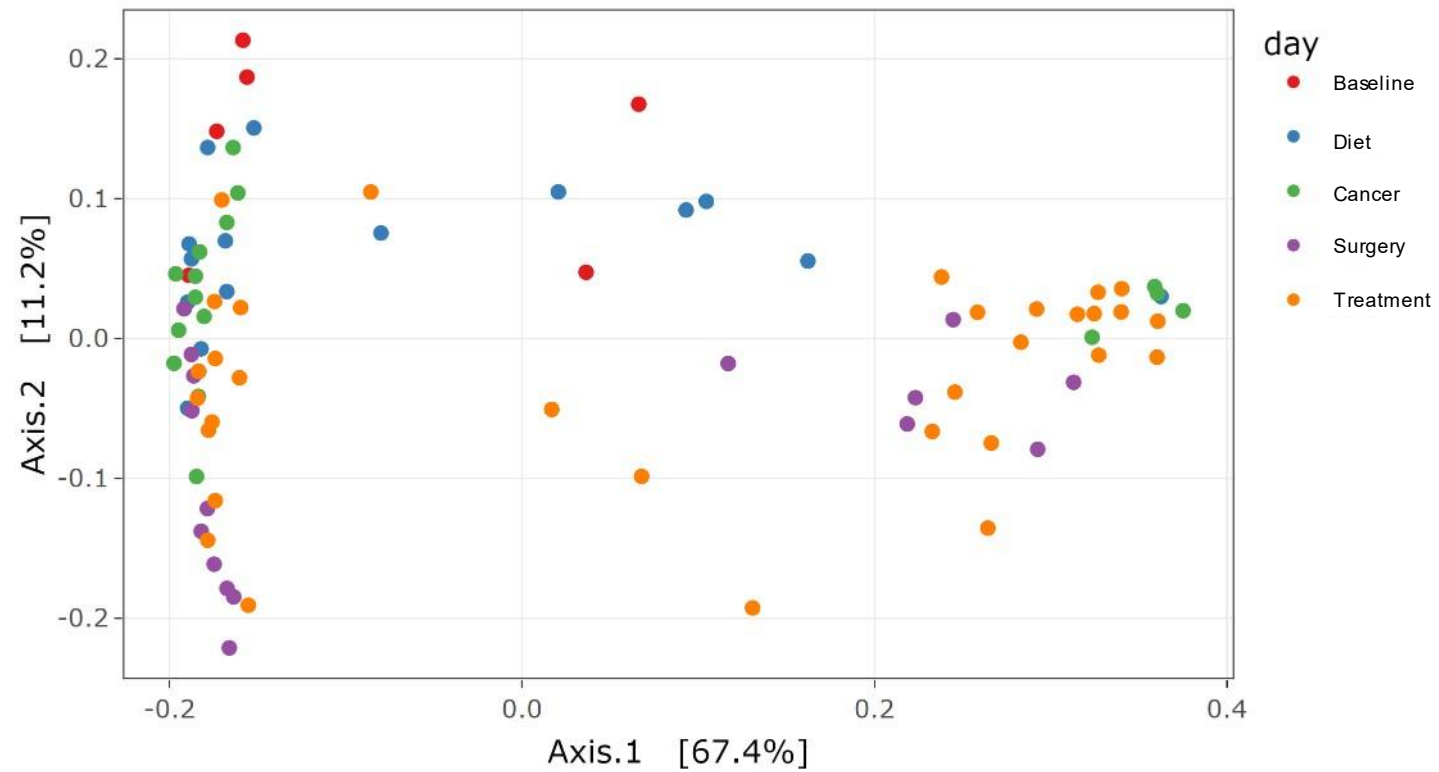

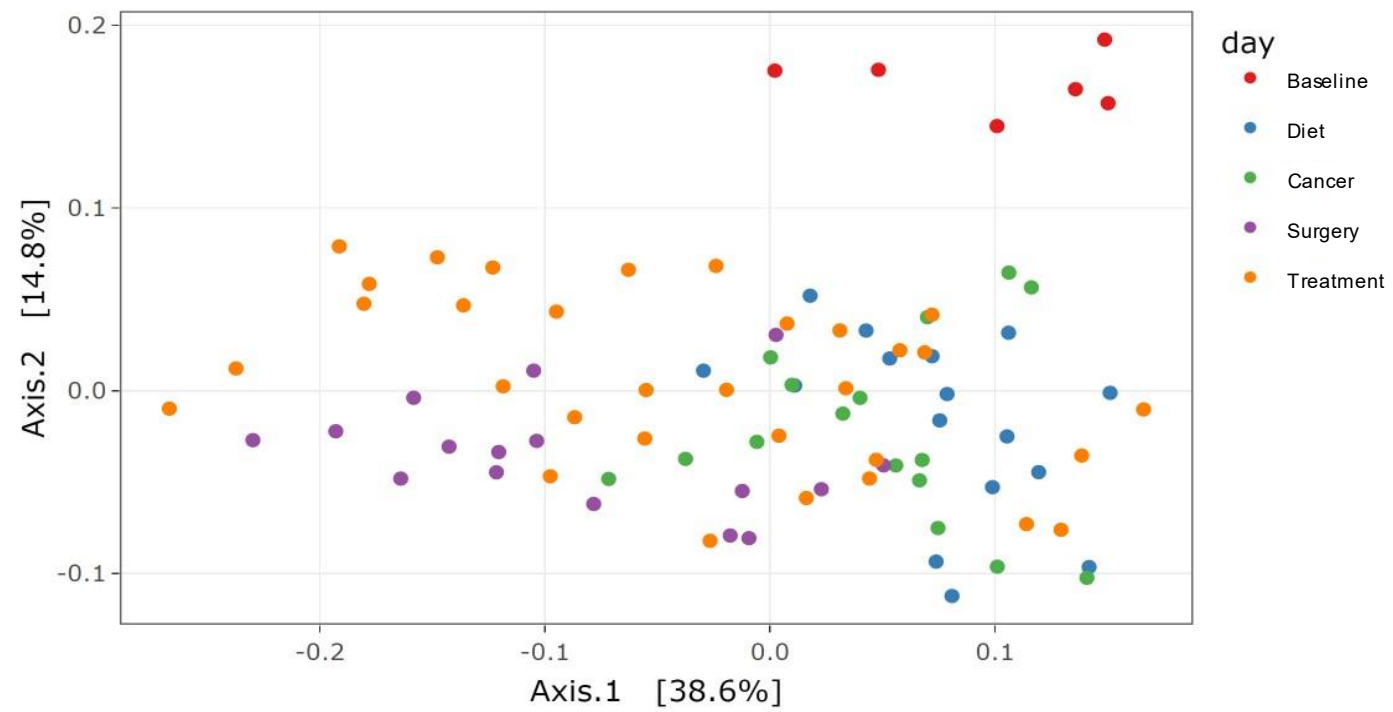

**Figure S5b.** Ordination from principal coordinate analysis which excludes ASV1



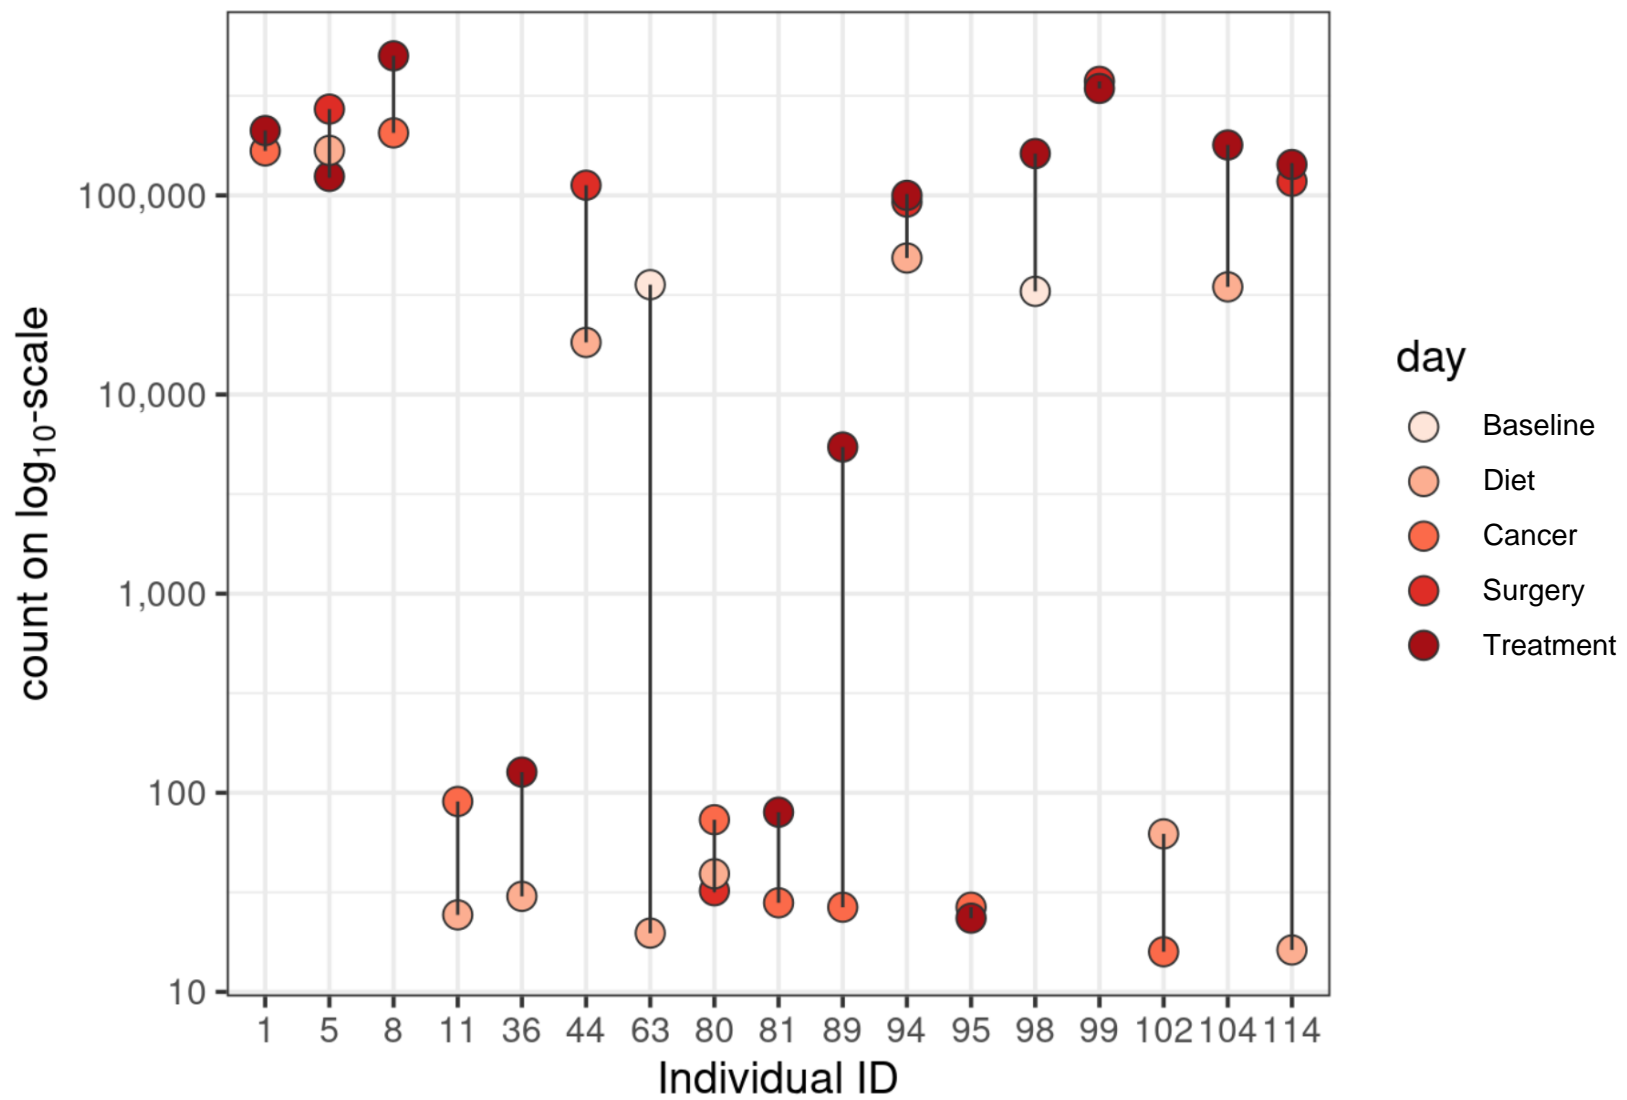

**Figure S6.** ASV1 abundance of individual mice by timepoint
